# Supplementary material for: Natalizumab restores aberrant miRNA expression profile in multiple sclerosis and reveals a critical role for miR-20b
Source: PubMed Central journal article supplement — Ann Clin Transl Neurol. 2014 Dec 5;2(1):43–55. doi: 10.1002/acn3.152 (PMC4301674; doi:10.1002/acn3.152), 2014-12-05
Supplement: acn30002-0043-sd1.pdf [file acn30002-0043-sd1.pdf]

**Supplementary material for  
Ingwersen *et al.*: Natalizumab restores impaired miRNA expression profile  
in multiple sclerosis and reveals a critical role for miR-20b**

**Supplementary methods**

**MicroRNA microarray: further details**

Following hybridization for 16 hours at 42°C, the biochip was washed automatically and subjected to signal detection with the GRTA. The resulting detection pictures were evaluated with Geniom Wizard software. For each array, the median signal intensity was extracted from the raw data file, such that for each miRNA, seven intensity values were calculated corresponding to each replicate copy of the miRBase on the array. Following background correction, the seven replicate intensity values of each miRNA were summarized according to their median value. To normalize the data across different arrays, quantile normalization was applied, and all further analyses were carried out using the normalized and background-subtracted intensity values.

# Supplementary Figure 1

## A

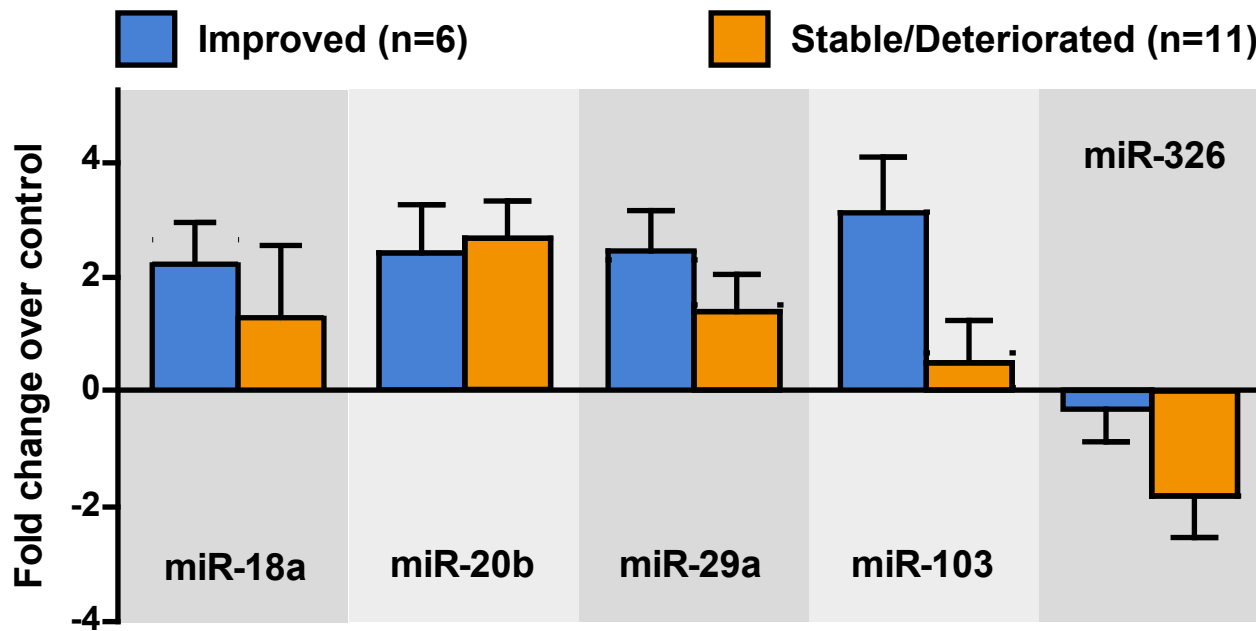

## B

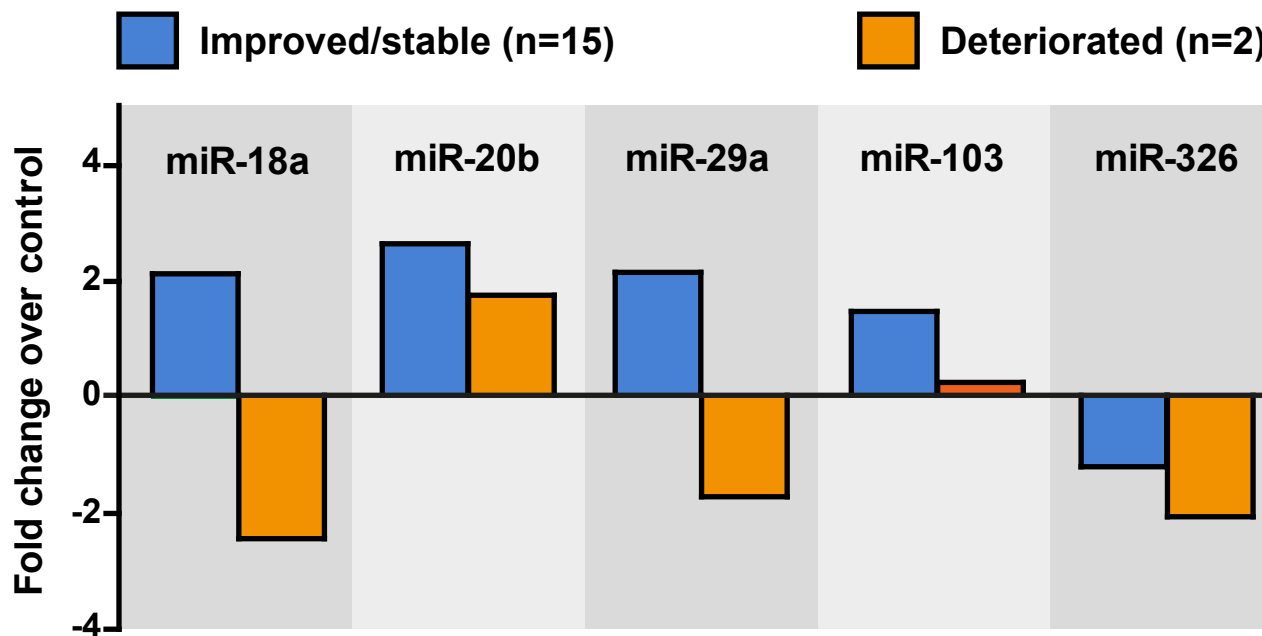

Disease response analysis. Shown are ratios of quantitative PCR expression levels of selected miRNAs from patients before (baseline) and during natalizumab therapy. A) Comparison of patients that improved in EDSS (n=6) and that were stable or deteriorated (n=11). B) Comparison of patients that improved or were stable (n=15) and that deteriorated (n=2). See also supplementary table 1.

## Supplementary Figure 2

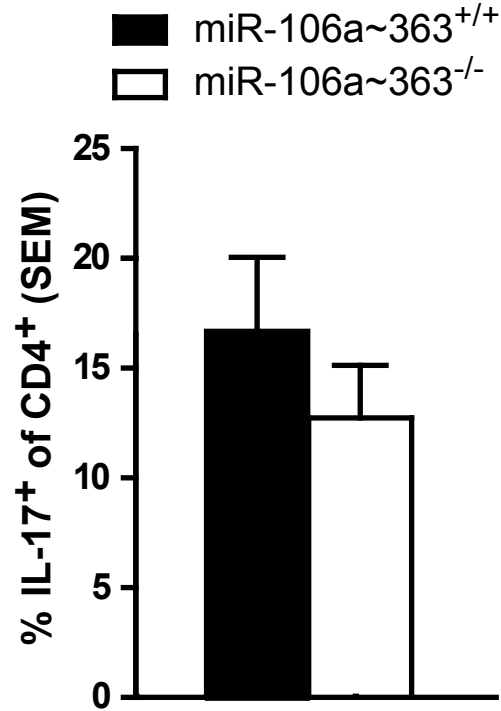

Magnetic bead isolated mouse CD4<sup>+</sup> cells were incubated with anti-CD3-antibody (1µg/ml), IL-6 (20ng/ml) and TGF-beta (2ng/ml) for 4 days in the presence of irradiated APC. Analysis was performed using BD Leukocyte Activation Cocktail, intracellular staining using BD Cytofix/Cytoperm buffers (Becton Dickinson) and subsequent FACS analysis. Pooled data from 4 experiments (each n=5/per group).

## Supplementary Figure 3

### A

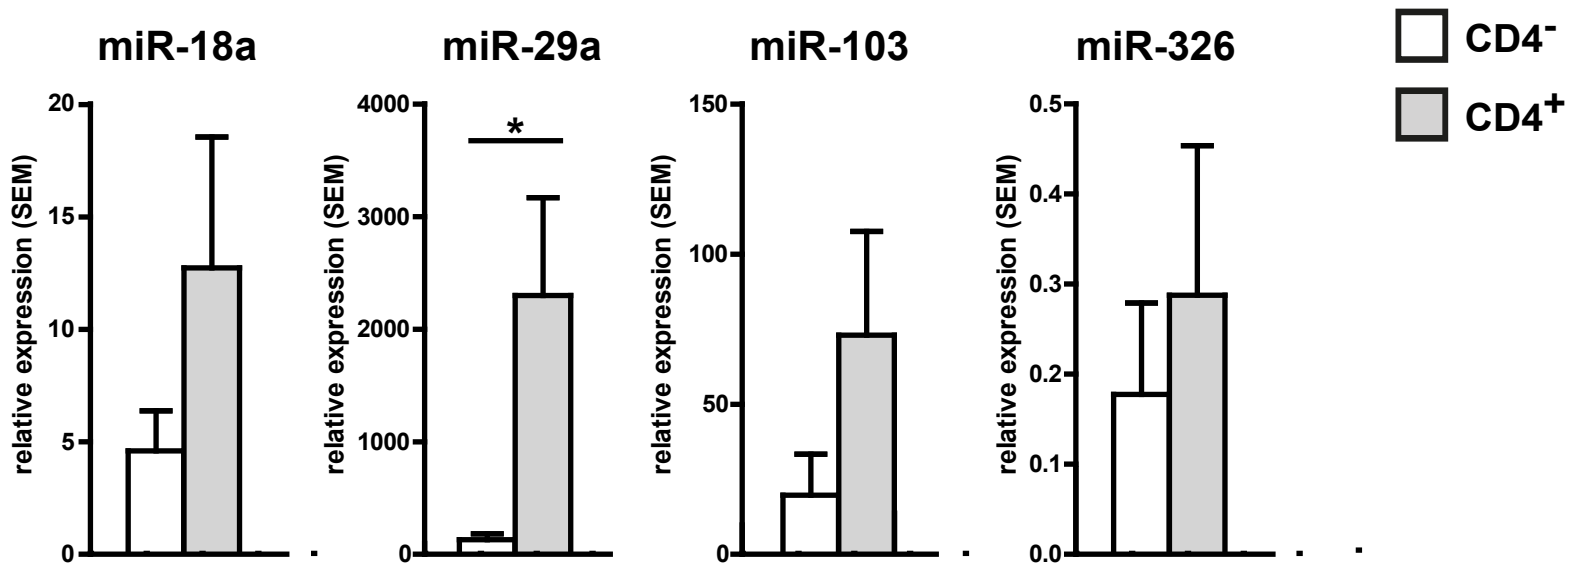

PBMC were isolated using a ficoll gradient and CD4<sup>+</sup> T cells were sorted with magnetic beads (n=9). miRNA expression was measured in CD4<sup>+</sup> cells and CD4<sup>-</sup> PBMC by qPCR. Significance was calculated using *t* test.

### B

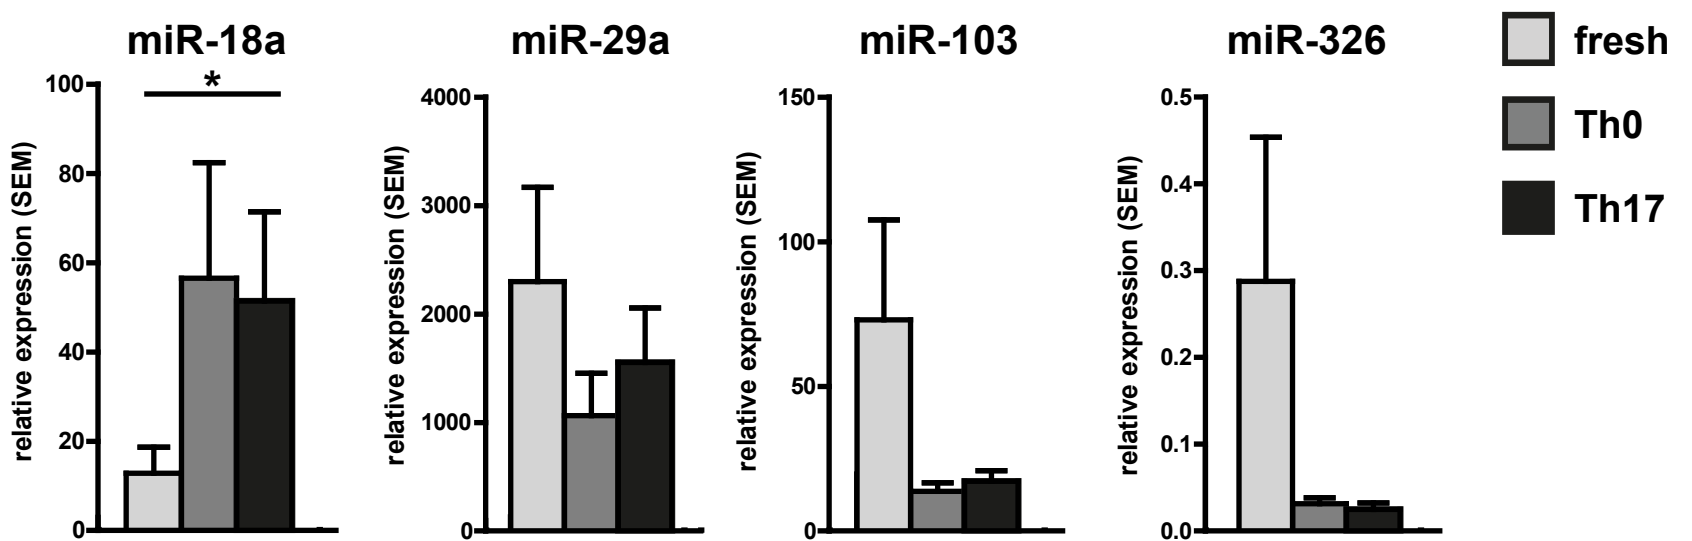

PBMC were isolated using a ficoll gradient and CD4<sup>+</sup> T cells were sorted with magnetic beads (n=9). miRNA expression was measured in freshly isolated CD4<sup>+</sup> cells ("fresh"), CD4<sup>+</sup> cells that were activated by plate-bound anti-CD3-antibody and soluble anti-CD28-antibody without further cytokines, (termed "Th0") and with IL-1 (10ng/ml), IL-6 (10ng/ml), IL23 (10ng/ml) and TGB-beta (5ng/ml), termed "Th17") by qPCR. Significance was calculated using *t* test.

### C

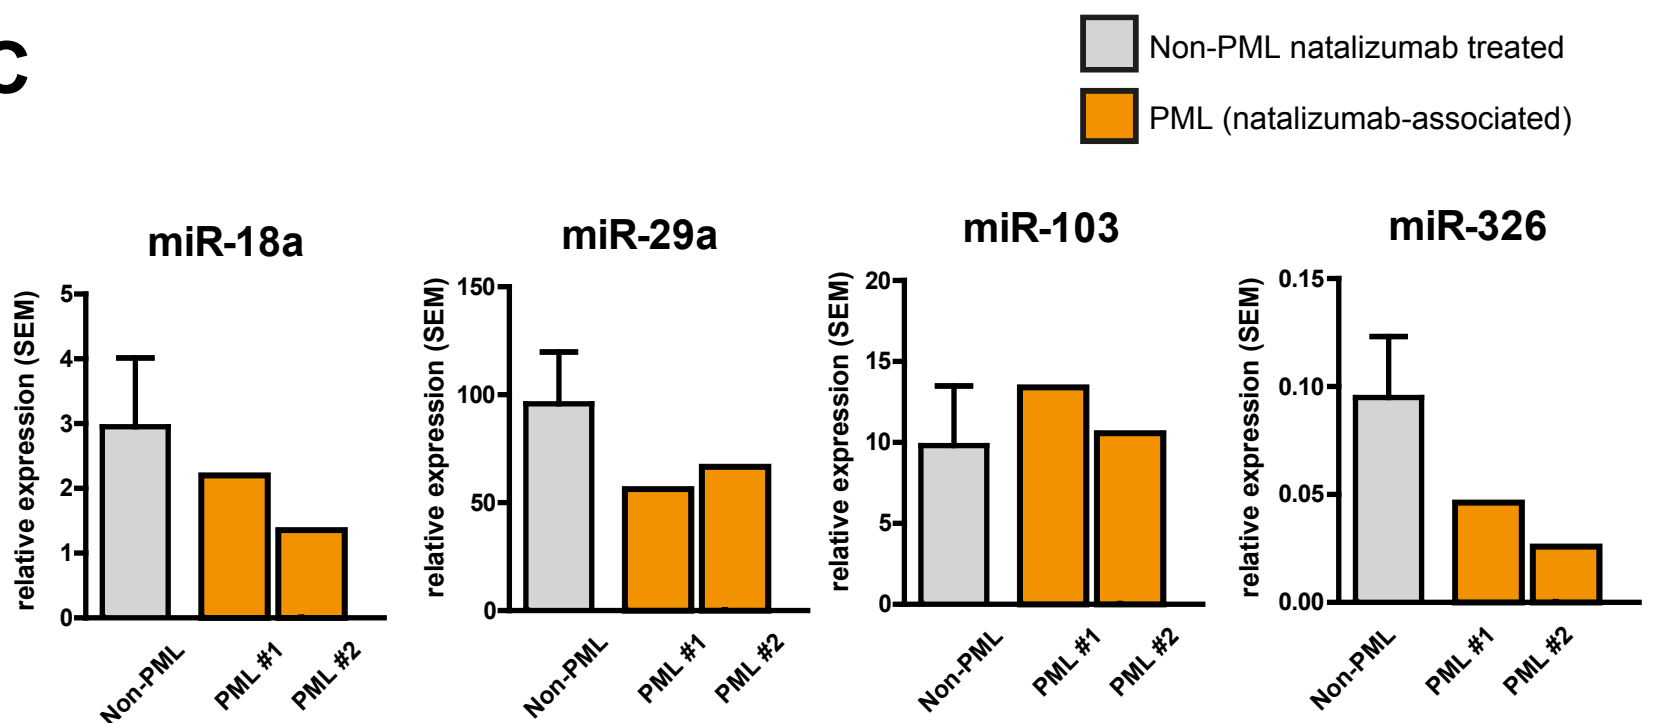

miRNA levels in PBMC from natalizumab treated patients (n=9, left bar) were compared to two PBMC samples from patients with natalizumab-associated PML (each patient one bar). Due to small sample size statistical tests were not performed.

**Supplementary Table 1:****Demographical and clinical data for the longitudinal study population.**

| Patient No | Disease Type | Age | Gender | Disease duration (months) | EDSS before Nat | EDSS after Nat | Relapses during Nat | Duration of Nat Treatment (months) |
|------------|--------------|-----|--------|---------------------------|-----------------|----------------|---------------------|------------------------------------|
| 1          | RRMS         | 33  | F      | 62                        | 1               | 1              | 0                   | 17                                 |
| 2          | RRMS         | 31  | F      | 120                       | 1               | 1              | 0                   | 16                                 |
| 3          | RRMS         | 36  | F      | 81                        | 2               | 2              | 0                   | 14                                 |
| 4          | RRMS         | 46  | M      | 84                        | 3.5             | 2.5            | 0                   | 20                                 |
| 5          | RRMS         | 34  | F      | 192                       | 2               | 1.5            | 0                   | 20                                 |
| 6          | RRMS         | 50  | F      | 33                        | 1               | 1              | 0                   | 14                                 |
| 7          | RRMS         | 30  | M      | 120                       | 2.5             | 4              | 1                   | 20                                 |
| 8          | RRMS         | 42  | M      | 21                        | 3               | 3              | 0                   | 16                                 |
| 9          | RRMS         | 45  | F      | 78                        | 3               | 3              | 3                   | 18                                 |
| 10         | RRMS         | 30  | M      | 23                        | 2               | 2              | 0                   | 18                                 |
| 11         | RRMS         | 49  | F      | 312                       | 3.5             | 3.5            | 0                   | 17                                 |
| 12         | RRMS         | 33  | F      | 132                       | 2               | 2              | 0                   | 17                                 |
| 13         | RRMS         | 29  | F      | 108                       | 2               | 1              | 0                   | 12                                 |
| 14         | RRMS         | 41  | F      | 36                        | 2               | 0              | 0                   | 22                                 |
| 15         | RRMS         | 26  | F      | 24                        | 2               | 1              | 0                   | 12                                 |
| 16         | RRMS         | 31  | F      | 72                        | 6.5             | 6.5            | 0                   | 12                                 |
| 17         | RRMS         | 31  | F      | 24                        | 2.5             | 1              | 0                   | 21                                 |

RRMS: relapsing-remitting multiple sclerosis; EDSS: expanded disability status score; Nat: natalizumab treatment.

**Supplementary Table 2:**

**Data from the miRNA microarray of MS baseline samples vs. healthy control samples:**

**Downregulated miRNAs with p values < 0.05 (corrected p value, limma pval) were sorted by p value.**

| miRNA      | Healthy controls median (log2) | MS prior to treatment median (log2) | Absolute fold change median [MS vs. healthy control] (log2) | ttest rawp | ttest adjp | limma rawp | limma adjp |
|------------|--------------------------------|-------------------------------------|-------------------------------------------------------------|------------|------------|------------|------------|
| miR-18a    | 11.24                          | 9.20                                | -2.04                                                       | 1.28E-03   | 1.85E-02   | 1.88E-09   | 7.99E-07   |
| miR-18b    | 9.06                           | 7.33                                | -1.73                                                       | 2.40E-03   | 2.58E-02   | 6.63E-09   | 1.45E-06   |
| miR-378    | 8.47                           | 7.10                                | -1.37                                                       | 1.07E-03   | 1.76E-02   | 1.56E-08   | 2.64E-06   |
| miR-98     | 5.58                           | 3.46                                | -2.12                                                       | 1.86E-02   | 8.07E-02   | 6.90E-08   | 6.51E-06   |
| miR-320a   | 14.01                          | 12.49                               | -1.52                                                       | 1.65E-05   | 3.00E-03   | 1.49E-07   | 1.20E-05   |
| let-7c     | 9.35                           | 5.69                                | -3.66                                                       | 1.30E-02   | 6.51E-02   | 2.08E-07   | 1.47E-05   |
| let-7i     | 10.12                          | 6.05                                | -4.07                                                       | 5.80E-03   | 4.20E-02   | 3.84E-07   | 2.33E-05   |
| miR-144    | 11.95                          | 9.66                                | -2.29                                                       | 3.94E-05   | 3.00E-03   | 4.45E-07   | 2.52E-05   |
| miR-337-3p | 5.37                           | 4.16                                | -1.21                                                       | 1.50E-03   | 1.98E-02   | 5.66E-07   | 3.00E-05   |
| let-7b     | 10.56                          | 7.99                                | -2.57                                                       | 1.15E-02   | 6.27E-02   | 7.94E-07   | 3.96E-05   |
| miR-144*   | 9.71                           | 8.28                                | -1.43                                                       | 1.89E-04   | 6.98E-03   | 1.31E-06   | 5.05E-05   |
| miR-101    | 9.66                           | 8.06                                | -1.6                                                        | 1.13E-03   | 1.76E-02   | 1.63E-06   | 6.00E-05   |
| miR-9      | 4.85                           | 3.57                                | -1.28                                                       | 1.16E-03   | 1.76E-02   | 1.71E-06   | 6.04E-05   |
| let-7f     | 9.70                           | 6.39                                | -3.31                                                       | 7.28E-03   | 4.77E-02   | 2.15E-06   | 7.28E-05   |
| miR-221    | 7.17                           | 5.92                                | -1.25                                                       | 2.78E-03   | 2.84E-02   | 2.24E-06   | 7.31E-05   |
| miR-106b   | 14.10                          | 12.85                               | -1.25                                                       | 3.05E-05   | 3.00E-03   | 3.36E-06   | 1.02E-04   |
| miR-30e    | 8.35                           | 6.52                                | -1.83                                                       | 1.97E-02   | 8.31E-02   | 3.68E-06   | 1.08E-04   |
| miR-210    | 10.01                          | 8.68                                | -1.33                                                       | 2.29E-03   | 2.53E-02   | 3.90E-06   | 1.10E-04   |
| miR-758    | 5.94                           | 4.41                                | -1.53                                                       | 2.97E-02   | 1.06E-01   | 6.28E-06   | 1.72E-04   |
| miR-24     | 11.61                          | 9.96                                | -1.65                                                       | 1.16E-03   | 1.76E-02   | 7.64E-06   | 2.02E-04   |
| miR-454    | 8.13                           | 6.87                                | -1.26                                                       | 4.10E-03   | 3.45E-02   | 7.95E-06   | 2.04E-04   |

|            |       |       |       |          |          |          |          |
|------------|-------|-------|-------|----------|----------|----------|----------|
| miR-320d   | 9.82  | 8.29  | -1.53 | 4.24E-05 | 3.00E-03 | 9.24E-06 | 2.24E-04 |
| miR-30a    | 8.73  | 6.94  | -1.79 | 3.99E-03 | 3.42E-02 | 1.19E-05 | 2.80E-04 |
| let-7d     | 11.62 | 10.12 | -1.5  | 6.37E-03 | 4.39E-02 | 1.36E-05 | 3.11E-04 |
| miR-429    | 6.33  | 5.07  | -1.26 | 3.78E-04 | 1.09E-02 | 1.47E-05 | 3.12E-04 |
| let-7g     | 9.20  | 5.92  | -3.28 | 1.17E-02 | 6.32E-02 | 1.60E-05 | 3.21E-04 |
| miR-302d   | 4.55  | 3.73  | -0.82 | 3.20E-04 | 1.05E-02 | 3.77E-05 | 6.40E-04 |
| miR-29c    | 8.86  | 7.31  | -1.55 | 1.06E-02 | 6.05E-02 | 3.99E-05 | 6.51E-04 |
| miR-320b   | 11.63 | 10.31 | -1.32 | 3.66E-03 | 3.33E-02 | 4.83E-05 | 7.06E-04 |
| miR-26a-2* | 4.42  | 3.46  | -0.96 | 4.79E-04 | 1.23E-02 | 5.05E-05 | 7.25E-04 |
| miR-582-3p | 6.92  | 6.03  | -0.89 | 7.50E-05 | 4.79E-03 | 5.26E-05 | 7.31E-04 |
| miR-323-3p | 5.91  | 4.77  | -1.14 | 5.92E-03 | 4.20E-02 | 5.98E-05 | 8.19E-04 |
| miR-744    | 10.01 | 9.01  | -1    | 8.46E-04 | 1.66E-02 | 6.11E-05 | 8.23E-04 |
| miR-720    | 12.30 | 10.87 | -1.43 | 6.00E-03 | 4.20E-02 | 6.32E-05 | 8.31E-04 |
| miR-652    | 10.68 | 9.65  | -1.03 | 1.34E-02 | 6.55E-02 | 6.37E-05 | 8.31E-04 |
| miR-20b    | 12.46 | 11.27 | -1.19 | 2.18E-03 | 2.53E-02 | 8.01E-05 | 1.01E-03 |
| miR-17*    | 9.92  | 9.14  | -0.78 | 1.13E-03 | 1.76E-02 | 8.97E-05 | 1.12E-03 |
| miR-532-5p | 8.61  | 7.22  | -1.39 | 7.01E-03 | 4.64E-02 | 9.39E-05 | 1.15E-03 |
| miR-25     | 12.85 | 11.33 | -1.52 | 1.22E-02 | 6.44E-02 | 9.87E-05 | 1.20E-03 |
| miR-374a   | 8.51  | 7.15  | -1.36 | 1.92E-03 | 2.29E-02 | 1.05E-04 | 1.25E-03 |
| miR-148b   | 9.67  | 8.67  | -1    | 1.15E-04 | 6.07E-03 | 1.13E-04 | 1.29E-03 |
| miR-146a   | 7.68  | 6.77  | -0.91 | 6.92E-03 | 4.62E-02 | 1.10E-04 | 1.29E-03 |
| miR-29b    | 8.51  | 7.66  | -0.85 | 1.34E-03 | 1.85E-02 | 1.28E-04 | 1.42E-03 |
| miR-423-5p | 11.84 | 10.81 | -1.03 | 1.87E-03 | 2.27E-02 | 1.39E-04 | 1.54E-03 |
| miR-30e*   | 6.17  | 5.08  | -1.09 | 9.18E-03 | 5.41E-02 | 1.52E-04 | 1.63E-03 |
| miR-92a    | 13.70 | 12.76 | -0.94 | 3.88E-02 | 1.23E-01 | 1.60E-04 | 1.70E-03 |
| miR-1288   | 6.87  | 5.95  | -0.92 | 6.85E-04 | 1.46E-02 | 1.65E-04 | 1.73E-03 |
| miR-1290   | 4.64  | 3.67  | -0.97 | 1.31E-03 | 1.85E-02 | 2.01E-04 | 2.00E-03 |
| miR-19a    | 10.95 | 9.99  | -0.96 | 6.61E-03 | 4.47E-02 | 2.34E-04 | 2.28E-03 |

|            |       |       |       |          |          |          |          |
|------------|-------|-------|-------|----------|----------|----------|----------|
| miR-142-5p | 9.70  | 8.18  | -1.52 | 1.33E-02 | 6.55E-02 | 2.94E-04 | 2.74E-03 |
| miR-185    | 14.96 | 13.56 | -1.4  | 1.58E-02 | 7.27E-02 | 4.20E-04 | 3.64E-03 |
| let-7e     | 7.53  | 5.89  | -1.64 | 2.30E-02 | 9.25E-02 | 4.92E-04 | 4.22E-03 |
| miR-335*   | 4.69  | 3.56  | -1.13 | 1.41E-01 | 2.81E-01 | 5.93E-04 | 4.93E-03 |
| miR-151-5p | 12.41 | 11.34 | -1.07 | 3.40E-02 | 1.15E-01 | 6.24E-04 | 5.04E-03 |
| miR-331-5p | 5.64  | 4.82  | -0.82 | 4.44E-01 | 6.01E-01 | 6.33E-04 | 5.04E-03 |
| miR-93     | 12.47 | 11.51 | -0.96 | 1.10E-02 | 6.10E-02 | 7.15E-04 | 5.56E-03 |
| miR-106a   | 13.45 | 12.29 | -1.16 | 2.37E-03 | 2.58E-02 | 7.51E-04 | 5.69E-03 |
| miR-126    | 11.56 | 10.03 | -1.53 | 1.10E-02 | 6.10E-02 | 8.49E-04 | 6.20E-03 |
| miR-340    | 7.89  | 6.86  | -1.03 | 1.35E-03 | 1.85E-02 | 8.42E-04 | 6.20E-03 |
| miR-320c   | 9.48  | 8.57  | -0.91 | 1.26E-02 | 6.51E-02 | 1.02E-03 | 7.30E-03 |
| miR-1908   | 10.40 | 8.59  | -1.81 | 4.48E-03 | 3.58E-02 | 1.10E-03 | 7.68E-03 |
| miR-21     | 9.87  | 8.45  | -1.42 | 1.98E-02 | 8.32E-02 | 1.13E-03 | 7.81E-03 |
| miR-130a   | 10.23 | 9.25  | -0.98 | 5.12E-02 | 1.50E-01 | 1.40E-03 | 9.40E-03 |
| miR-655    | 5.93  | 5.09  | -0.84 | 3.46E-03 | 3.23E-02 | 1.47E-03 | 9.75E-03 |
| miR-205    | 6.20  | 5.47  | -0.73 | 1.29E-02 | 6.51E-02 | 1.60E-03 | 1.05E-02 |
| miR-29a*   | 4.65  | 3.59  | -1.06 | 1.77E-01 | 3.31E-01 | 1.62E-03 | 1.05E-02 |
| miR-484    | 12.84 | 11.67 | -1.17 | 5.44E-02 | 1.54E-01 | 1.66E-03 | 1.06E-02 |
| miR-20a    | 12.89 | 11.83 | -1.06 | 5.72E-03 | 4.20E-02 | 1.69E-03 | 1.08E-02 |
| miR-29b-2* | 6.02  | 5.13  | -0.89 | 1.86E-02 | 8.07E-02 | 1.75E-03 | 1.10E-02 |
| miR-223    | 10.50 | 8.81  | -1.69 | 1.53E-01 | 2.98E-01 | 1.78E-03 | 1.11E-02 |
| miR-103    | 13.09 | 12.29 | -0.8  | 2.70E-02 | 9.95E-02 | 1.79E-03 | 1.11E-02 |
| miR-215    | 8.65  | 7.46  | -1.19 | 4.42E-02 | 1.36E-01 | 2.40E-03 | 1.44E-02 |
| miR-30c-1* | 6.31  | 5.26  | -1.05 | 4.62E-03 | 3.66E-02 | 2.44E-03 | 1.45E-02 |
| miR-1243   | 6.35  | 5.61  | -0.74 | 1.10E-02 | 6.10E-02 | 2.71E-03 | 1.56E-02 |
| miR-196b   | 4.11  | 3.02  | -1.09 | 9.00E-01 | 9.48E-01 | 2.82E-03 | 1.60E-02 |
| miR-548n   | 5.57  | 4.71  | -0.86 | 1.29E-02 | 6.51E-02 | 3.60E-03 | 1.97E-02 |
| miR-125b   | 9.34  | 8.17  | -1.17 | 3.08E-01 | 4.74E-01 | 3.72E-03 | 2.02E-02 |



|             |       |       |       |          |          |          |          |
|-------------|-------|-------|-------|----------|----------|----------|----------|
| miR-181a    | 9.71  | 8.49  | -1.22 | 1.51E-02 | 7.16E-02 | 4.16E-03 | 2.19E-02 |
| miR-29a     | 9.38  | 8.34  | -1.04 | 3.28E-02 | 1.12E-01 | 4.59E-03 | 2.37E-02 |
| let-7a      | 10.24 | 8.57  | -1.67 | 1.29E-02 | 6.51E-02 | 4.73E-03 | 2.40E-02 |
| miR-409-3p  | 5.69  | 4.46  | -1.23 | 3.49E-01 | 5.09E-01 | 4.94E-03 | 2.47E-02 |
| miR-502-5p  | 5.03  | 3.72  | -1.31 | 1.09E-01 | 2.44E-01 | 5.61E-03 | 2.73E-02 |
| miR-374b    | 8.99  | 8.19  | -0.8  | 2.96E-02 | 1.06E-01 | 5.68E-03 | 2.74E-02 |
| miR-146a*   | 6.95  | 6.06  | -0.89 | 9.57E-03 | 5.56E-02 | 5.82E-03 | 2.77E-02 |
| miR-643     | 6.35  | 5.52  | -0.83 | 9.51E-04 | 1.75E-02 | 6.68E-03 | 3.06E-02 |
| miR-23b     | 11.65 | 10.50 | -1.15 | 2.06E-01 | 3.62E-01 | 7.00E-03 | 3.13E-02 |
| miR-199b-3p | 7.37  | 6.54  | -0.83 | 2.73E-03 | 2.84E-02 | 7.53E-03 | 3.34E-02 |
| miR-149*    | 9.49  | 8.31  | -1.18 | 1.72E-02 | 7.76E-02 | 9.41E-03 | 3.83E-02 |
| miR-22      | 12.71 | 11.85 | -0.86 | 5.38E-02 | 1.53E-01 | 9.75E-03 | 3.92E-02 |
| miR-632     | 5.29  | 4.40  | -0.89 | 2.14E-01 | 3.69E-01 | 9.99E-03 | 4.00E-02 |
| miR-19b     | 13.48 | 12.31 | -1.17 | 1.24E-01 | 2.61E-01 | 1.01E-02 | 4.01E-02 |
| miR-664     | 7.73  | 6.77  | -0.96 | 1.99E-01 | 3.56E-01 | 1.02E-02 | 4.02E-02 |
| miR-135a*   | 4.80  | 3.93  | -0.87 | 3.98E-02 | 1.26E-01 | 1.30E-02 | 4.91E-02 |

**Supplementary Table 3**

Data from the miRNA microarray of MS baseline samples vs. healthy control samples:

Upregulated miRNAs with p values < 0.05 (corrected p value, limma pval) were sorted by p value.

| miRNA       | Healthy controls median (log2) | MS prior to treatment median (log2) | Absolute fold change median [MS vs. healthy control] (log2) | ttest rawp | ttest adjp | limma rawp | limma adjp |
|-------------|--------------------------------|-------------------------------------|-------------------------------------------------------------|------------|------------|------------|------------|
| miR-1914    | 5.02                           | 6.74                                | 1.72                                                        | 2.50E-07   | 1.06E-04   | 4.90E-10   | 4.15E-07   |
| miR-485-5p  | 5.40                           | 6.74                                | 1.34                                                        | 3.21E-08   | 2.73E-05   | 6.85E-09   | 1.45E-06   |
| miR-608     | 5.98                           | 8.39                                | 2.41                                                        | 4.24E-05   | 3.00E-03   | 2.05E-08   | 2.89E-06   |
| miR-185*    | 4.40                           | 6.73                                | 2.33                                                        | 9.54E-03   | 5.56E-02   | 6.67E-08   | 6.51E-06   |
| miR-1183    | 6.57                           | 8.33                                | 1.76                                                        | 1.48E-04   | 6.76E-03   | 6.46E-08   | 6.51E-06   |
| miR-30b*    | 4.50                           | 6.31                                | 1.81                                                        | 9.66E-05   | 5.46E-03   | 1.55E-07   | 1.20E-05   |
| miR-323-5p  | 5.28                           | 6.82                                | 1.54                                                        | 2.23E-04   | 7.87E-03   | 2.28E-07   | 1.49E-05   |
| miR-224     | 4.71                           | 6.47                                | 1.76                                                        | 5.75E-04   | 1.43E-02   | 8.50E-07   | 4.00E-05   |
| miR-623     | 5.54                           | 6.97                                | 1.43                                                        | 5.25E-06   | 1.49E-03   | 9.80E-07   | 4.37E-05   |
| miR-1250    | 5.31                           | 6.81                                | 1.50                                                        | 1.72E-04   | 6.93E-03   | 1.14E-06   | 4.81E-05   |
| miR-551b    | 5.57                           | 7.28                                | 1.71                                                        | 2.26E-05   | 3.00E-03   | 1.27E-06   | 5.05E-05   |
| miR-1268    | 8.35                           | 10.07                               | 1.72                                                        | 3.86E-04   | 1.09E-02   | 3.36E-06   | 1.02E-04   |
| miR-577     | 4.81                           | 6.08                                | 1.27                                                        | 1.80E-04   | 6.95E-03   | 9.11E-06   | 2.24E-04   |
| miR-595     | 6.97                           | 8.37                                | 1.40                                                        | 1.09E-03   | 1.76E-02   | 1.40E-05   | 3.12E-04   |
| miR-651     | 3.96                           | 5.40                                | 1.44                                                        | 1.02E-03   | 1.76E-02   | 1.47E-05   | 3.12E-04   |
| miR-613     | 4.09                           | 5.69                                | 1.60                                                        | 6.42E-03   | 4.39E-02   | 1.68E-05   | 3.21E-04   |
| miR-644     | 4.47                           | 5.75                                | 1.28                                                        | 1.32E-03   | 1.85E-02   | 1.58E-05   | 3.21E-04   |
| miR-1265    | 4.38                           | 5.46                                | 1.08                                                        | 1.32E-02   | 6.55E-02   | 1.67E-05   | 3.21E-04   |
| miR-551a    | 5.75                           | 6.77                                | 1.02                                                        | 4.20E-05   | 3.00E-03   | 1.71E-05   | 3.21E-04   |
| miR-139-3p  | 6.24                           | 7.31                                | 1.07                                                        | 3.29E-05   | 3.00E-03   | 1.94E-05   | 3.58E-04   |
| miR-146b-3p | 5.42                           | 6.67                                | 1.25                                                        | 2.32E-04   | 7.88E-03   | 2.30E-05   | 4.15E-04   |

|            |      |      |      |          |          |          |          |
|------------|------|------|------|----------|----------|----------|----------|
| miR-1204   | 4.43 | 6.00 | 1.57 | 1.60E-03 | 2.07E-02 | 3.00E-05 | 5.30E-04 |
| miR-371-5p | 5.25 | 6.32 | 1.07 | 6.17E-04 | 1.46E-02 | 3.10E-05 | 5.36E-04 |
| miR-1306   | 4.85 | 6.03 | 1.18 | 2.25E-03 | 2.53E-02 | 3.99E-05 | 6.51E-04 |
| miR-99b    | 7.18 | 8.11 | 0.93 | 4.09E-04 | 1.09E-02 | 4.42E-05 | 6.95E-04 |
| miR-92a-2* | 4.26 | 5.51 | 1.25 | 3.22E-03 | 3.13E-02 | 4.76E-05 | 7.06E-04 |
| miR-1299   | 4.71 | 5.65 | 0.94 | 8.60E-04 | 1.66E-02 | 4.74E-05 | 7.06E-04 |
| miR-1255a  | 5.80 | 6.72 | 0.92 | 1.29E-04 | 6.45E-03 | 4.75E-05 | 7.06E-04 |
| miR-611    | 6.43 | 7.39 | 0.96 | 1.52E-04 | 6.76E-03 | 7.77E-05 | 9.98E-04 |
| miR-1538   | 6.20 | 7.26 | 1.06 | 1.69E-03 | 2.13E-02 | 1.13E-04 | 1.29E-03 |
| miR-361-3p | 7.18 | 8.34 | 1.16 | 7.39E-04 | 1.53E-02 | 1.20E-04 | 1.36E-03 |
| miR-641    | 5.94 | 6.76 | 0.82 | 7.91E-05 | 4.79E-03 | 1.50E-04 | 1.63E-03 |
| miR-1246   | 4.07 | 5.03 | 0.96 | 8.27E-03 | 5.11E-02 | 1.67E-04 | 1.73E-03 |
| miR-888*   | 5.39 | 6.51 | 1.12 | 1.13E-03 | 1.76E-02 | 1.88E-04 | 1.92E-03 |
| miR-1185   | 4.76 | 5.55 | 0.79 | 4.18E-03 | 3.45E-02 | 1.94E-04 | 1.96E-03 |
| miR-95     | 4.90 | 5.75 | 0.85 | 2.06E-03 | 2.42E-02 | 2.10E-04 | 2.07E-03 |
| miR-99a*   | 5.24 | 6.27 | 1.03 | 1.39E-02 | 6.75E-02 | 2.69E-04 | 2.58E-03 |
| miR-626    | 5.24 | 6.24 | 1.00 | 1.64E-04 | 6.93E-03 | 2.70E-04 | 2.58E-03 |
| miR-770-5p | 5.64 | 6.58 | 0.94 | 6.88E-04 | 1.46E-02 | 2.80E-04 | 2.64E-03 |
| miR-195*   | 5.88 | 6.75 | 0.87 | 1.31E-03 | 1.85E-02 | 3.26E-04 | 2.94E-03 |
| miR-766    | 8.58 | 9.31 | 0.73 | 4.90E-03 | 3.81E-02 | 3.42E-04 | 3.05E-03 |
| miR-593    | 4.23 | 4.94 | 0.71 | 4.26E-03 | 3.48E-02 | 3.73E-04 | 3.30E-03 |
| miR-1294   | 4.29 | 5.16 | 0.87 | 1.25E-02 | 6.51E-02 | 4.19E-04 | 3.64E-03 |
| miR-105    | 5.53 | 6.68 | 1.15 | 6.75E-04 | 1.46E-02 | 5.09E-04 | 4.32E-03 |
| miR-184    | 4.69 | 5.81 | 1.12 | 3.58E-04 | 1.09E-02 | 5.67E-04 | 4.76E-03 |
| miR-1273   | 6.67 | 7.62 | 0.95 | 6.35E-04 | 1.46E-02 | 6.08E-04 | 5.00E-03 |
| miR-140-5p | 4.71 | 5.58 | 0.87 | 4.19E-03 | 3.45E-02 | 6.16E-04 | 5.02E-03 |
| miR-432    | 4.08 | 5.04 | 0.96 | 5.88E-03 | 4.20E-02 | 6.36E-04 | 5.04E-03 |
| miR-657    | 6.04 | 6.81 | 0.77 | 7.99E-04 | 1.61E-02 | 6.48E-04 | 5.08E-03 |

|             |      |      |      |          |          |          |          |
|-------------|------|------|------|----------|----------|----------|----------|
| miR-212     | 5.82 | 6.87 | 1.05 | 1.15E-03 | 1.76E-02 | 7.24E-04 | 5.58E-03 |
| miR-876-3p  | 4.32 | 5.02 | 0.70 | 1.54E-02 | 7.18E-02 | 8.22E-04 | 6.12E-03 |
| miR-548c-5p | 4.59 | 5.55 | 0.96 | 5.26E-03 | 3.98E-02 | 9.68E-04 | 7.01E-03 |
| miR-369-5p  | 5.12 | 5.92 | 0.80 | 3.97E-03 | 3.42E-02 | 1.13E-03 | 7.81E-03 |
| miR-1182    | 4.64 | 5.75 | 1.11 | 6.65E-03 | 4.47E-02 | 1.63E-03 | 1.05E-02 |
| miR-134     | 5.69 | 6.59 | 0.90 | 5.15E-03 | 3.93E-02 | 1.74E-03 | 1.10E-02 |
| miR-516a-3p | 4.77 | 5.80 | 1.03 | 3.69E-03 | 3.33E-02 | 1.86E-03 | 1.14E-02 |
| miR-1269    | 5.63 | 6.35 | 0.72 | 7.31E-03 | 4.77E-02 | 2.06E-03 | 1.26E-02 |
| miR-628-5p  | 6.08 | 7.09 | 1.01 | 4.10E-04 | 1.09E-02 | 2.13E-03 | 1.29E-02 |
| miR-135b*   | 5.82 | 6.63 | 0.81 | 1.77E-03 | 2.18E-02 | 2.55E-03 | 1.49E-02 |
| miR-1295    | 6.97 | 7.74 | 0.77 | 8.80E-04 | 1.66E-02 | 2.75E-03 | 1.56E-02 |
| miR-1249    | 5.90 | 7.19 | 1.29 | 1.87E-02 | 8.07E-02 | 3.94E-03 | 2.10E-02 |
| miR-521     | 5.56 | 6.37 | 0.81 | 1.53E-02 | 7.16E-02 | 3.97E-03 | 2.10E-02 |
| miR-612     | 6.32 | 7.18 | 0.86 | 8.22E-03 | 5.11E-02 | 5.93E-03 | 2.80E-02 |
| miR-610     | 5.54 | 6.30 | 0.76 | 3.32E-03 | 3.16E-02 | 6.18E-03 | 2.89E-02 |
| miR-219-5p  | 5.42 | 6.16 | 0.74 | 3.27E-02 | 1.12E-01 | 6.95E-03 | 3.12E-02 |
| miR-337-5p  | 5.64 | 6.34 | 0.70 | 7.97E-03 | 5.05E-02 | 6.91E-03 | 3.12E-02 |
| miR-891a    | 6.83 | 7.66 | 0.83 | 3.21E-03 | 3.13E-02 | 8.28E-03 | 3.55E-02 |
| let-7f-1*   | 4.69 | 5.50 | 0.81 | 1.53E-02 | 7.16E-02 | 8.80E-03 | 3.69E-02 |
| miR-875-3p  | 5.58 | 6.34 | 0.76 | 4.76E-02 | 1.43E-01 | 9.15E-03 | 3.77E-02 |
| miR-639     | 5.93 | 6.84 | 0.91 | 3.87E-02 | 1.23E-01 | 1.08E-02 | 4.18E-02 |

**Supplementary Table 4**

Data show computationally predicted targets of miR-20b (mirSVR scoring regression method by the [www.microRNA.org](http://www.microRNA.org) information resource)

| mir SVR score: < -0.1 |                     |          |
|-----------------------|---------------------|----------|
| <i>Gene</i>           | <i>RefSeqID</i>     | miR-20b  |
| <i>Stat3</i>          | <i>NM_139276</i>    | 143, 436 |
| <i>Rorc (RORgT)</i>   | <i>NM_005060</i>    | 702      |
| <i>Vegfa</i>          | <i>NM_001025366</i> | 164      |
| <i>Il1b</i>           | <i>NM_000576</i>    | 0        |
| <i>Il6</i>            | <i>NM_000600</i>    | 0        |
| <i>Ifng</i>           | <i>NM_000619</i>    | 0        |
| <i>Csf2 (GM-CSF)</i>  | <i>NM_000758</i>    | 0        |

|          |               |
|----------|---------------|
| Position | Predicted     |
| 0        | Not predicted |

**Supplementary Table 5**

Data show analysis of promoters of miRNA targets with regard to regulation by  $\alpha 4\beta 1$ -receptor engagement investigated by the Transfac<sup>®</sup>-based P-Match tool ([www.gene-regulation.com](http://www.gene-regulation.com)) for transcription factor binding site search by combining patterns and weight matrices

| MiR-18a (Chr13) |          |        | Mir-20b (ChrX) |          |        | Mir-29a (Chr7) |          |        | MiR-103 (Chr5) |          |        | MiR-326 (Chr11) |          |        |
|-----------------|----------|--------|----------------|----------|--------|----------------|----------|--------|----------------|----------|--------|-----------------|----------|--------|
| Factor Name     | Position | Strand | Factor Name    | Position | Strand | Factor Name    | Position | Strand | Factor Name    | Position | Strand | Factor Name     | Position | Strand |
| c-Rel           | 4461     | (+)    | c-Rel          | 4603     | (+)    | ARP-1          | 4690     | (+)    | c-Rel          | 2819     | (+)    | Coup-TF/HNF     | 4460     | (-)    |
| c-Rel           | 4452     | (+)    | c-Rel          | 4288     | (-)    | Elk-1          | 4566     | (+)    | Evi-1          | 4482     | (-)    | c-Rel           | 3001     | (-)    |
| c-Rel           | 1466     | (-)    | c-Rel          | 2627     | (+)    | Elk-1          | 453      | (+)    | Evi-1          | 2607     | (+)    | c-Rel           | 3000     | (-)    |
| Evi-1           | 4851     | (+)    | c-Rel          | 2626     | (+)    | Evi-1          | 4232     | (-)    | Evi-1          | 2604     | (-)    | c-Rel           | 1777     | (-)    |
| Evi-1           | 4795     | (-)    | E2F            | 3795     | (+)    | Evi-1          | 1955     | (+)    | Evi-1          | 1801     | (+)    | c-Rel           | 782      | (-)    |
| Evi-1           | 552      | (-)    | E2F            | 2719     | (+)    | Evi-1          | 338      | (+)    | Evi-1          | 1186     | (-)    | Evi-1           | 3577     | (+)    |
| Evi-1           | 217      | (+)    | E2F            | 2133     | (-)    | HLF            | 1912     | (+)    | HLF            | 4403     | (+)    | Evi-1           | 1901     | (+)    |
| NF-kB           | 4451     | (+)    | Evi-1          | 1093     | (-)    | Myogenin/NF-1  | 116      | (-)    | NKx2-5         | 2489     | (-)    | IRF-1/IRF-2     | 4200     | (+)    |
| NF-kB(p65)      | 4452     | (+)    | Evi-1          | 359      | (-)    | NF-kB          | 65       | (-)    | STATx          | 1768     | (-)    | NF-kB           | 3249     | (-)    |
| NKx2-5          | 4473     | (-)    | Evi-1          | 223      | (-)    | NKx2-5         | 3563     | (-)    |                |          |        | NF-kB           | 782      | (-)    |
| STATx           | 4464     | (-)    | NF-kB(p50)     | 2730     | (+)    | NKx2-5         | 1675     | (-)    |                |          |        | NF-kB(p50)      | 3001     | (-)    |
| STATx           | 1582     | (-)    | NKx2-5         | 4318     | (-)    |                |          |        |                |          |        | NF-kB(p65)      | 3001     | (-)    |
|                 |          |        | NKx2-5         | 282      | (+)    |                |          |        |                |          |        |                 |          |        |

|  |              |
|--|--------------|
|  | NF-kB family |
|--|--------------|
